# Supplementary material for: Prediction of highly stable two-dimensional materials of boron and phosphorus: structural and electronic properties
Source: Royal Society of Chemistry journal article supplement (doi:10.1039/d2cp03243k), 2022-01-01
Supplement: d2cp03243k1.pdf [file d2cp03243k1.pdf]

Electronic Supplementary Material (ESI) for Physical Chemistry Chemical Physics.  
This journal is © the Owner Societies 2022

*Supporting Information*

**Prediction of highly stable two-dimensional materials of boron and phosphorus:  
structural and electronic properties**

Puxin Cheng,<sup>a</sup> Geng Li,<sup>\*a,b</sup> Shuming Zeng,<sup>c</sup> Yunlong Li,<sup>b</sup> Xiangfei Meng,<sup>b</sup> and Jialiang Xu<sup>\*a</sup>

<sup>a</sup> *School of Materials Science and Engineering, National Institute for Advanced Materials, Nankai University,  
Tongyan Road 38, Tianjin 300350 (P. R. China),*

*E-mail: [jialiang.xu@nankai.edu.cn](mailto:jialiang.xu@nankai.edu.cn).*

<sup>b</sup> *National Supercomputer Center in Tianjin, Tianjin 300457 (China),*

*E-mail: [ligeng@nsc-tj.cn](mailto:ligeng@nsc-tj.cn).*

<sup>c</sup> *Department of Physics, Yangzhou University, Yangzhou 225009, China.*

## Table of Contents

|    |                                                                  |   |
|----|------------------------------------------------------------------|---|
| 1. | Calculation Methodology .....                                    | 3 |
| 2. | Mechanical Properties .....                                      | 3 |
| 3. | Charge-transport Properties .....                                | 4 |
| 4. | Electronic Properties and Magnetism Under External Stimuli ..... | 5 |
| 5. | Cartesian Coordinates .....                                      | 6 |
| 6. | Comparison with $B_m N_n$ .....                                  | 7 |
| 7. | References .....                                                 | 7 |

## 1. Calculation Methodology

The elastic moduli  $C_{ij}$  of  $P2_1/m B_1P_3$  and  $Cm B_2P_4$  have been obtained from strain-energy relationship to investigate the mechanical property.<sup>1</sup> In the calculations, we have set seven different levels of applied strain to improve the accuracy, including positive strain (stretching the primitive cell), +1%, +2%, +3%, and negative strain (compressing the primitive cell), -1%, -2%, -3%. Other structural properties, such as, Bulk modulus  $K$ , Young's modulus  $E$ , Shear modulus  $G$  and Poisson ratio  $\nu$  (Table S1), can be obtained by the following formulas on the basis of Voigt-Reuss-Hill (VRH) approximation:<sup>1,2</sup>

$$K = \frac{K_V + K_R}{2}$$

$$E = \frac{9KG}{3K + G}$$

$$G = \frac{G_V + G_R}{2}$$

$$\nu = \frac{3K - 2G}{2(3K + G)}$$

Among them,  $K_V = \frac{1}{9}(C_{11} + C_{22} + C_{33}) + \frac{2}{9}(C_{12} + C_{13} + C_{23})$ ,  $K_R = \frac{1}{(S_{11}+S_{22}+S_{33})+2(S_{12}+S_{13}+S_{23})}$  and

$$G_V = \frac{1}{15}(C_{11} + C_{22} + C_{33} - C_{12} - C_{13} - C_{23}) + \frac{1}{5}(C_{44} + C_{55} + C_{66}),$$

$$G_R = \frac{15}{4(S_{11}+S_{22}+S_{33})-4(S_{12}+S_{13}+S_{23})+3(S_{44}+S_{55}+S_{66})},$$

where  $C_{ij}$  and  $S_{ij}$  are elastic constants and elastic compliances, respectively.

The intrinsic carrier mobility ( $\mu$ ) and relaxation time ( $\tau$ ) of  $P2_1/m B_1P_3$  and  $Cm B_2P_4$  have been calculated to investigate the electronic and charge-transport properties. The calculations are based on deformation potential (DP) theory and the used formula is as follows:<sup>3</sup>

$$\mu = \frac{e\tau}{m^*} = \frac{e\hbar^3 C}{k_B T m^* m_d (E_1)^2}$$

Thus, we have studied the fundamental DP parameters (elastic constant  $C$ , deformation potential constant  $E_1$ , charge effective mass  $m^*$  and the average effective mass  $m_d$ ). Among them,  $C$  is defined as  $C = \frac{\partial^2 E}{S_0 \partial(\Delta l/l)^2}$ , in which

$E$  denotes as the total energy of the compounds under  $\mathbf{a}$ - and  $\mathbf{b}$ -axis uniaxial strain.  $E_1$  is get from the equation as

$$E_1 = \frac{\partial E_{edg}}{\partial(\Delta l/l)},$$

where  $E_{edg}$  is the energy shift of CBM and VBM considering the vacuum level correction.<sup>4</sup>  $m^*$  and  $m_d$

are defined as  $m^* = \frac{\hbar^2}{\partial^2 E / \partial K^2}$  and  $m_d = \sqrt{m_x^* m_y^*}$ , respectively.<sup>5</sup>

## 2. Mechanical Properties

$P2_1/m B_1P_3$  is a monoclinic structure and has four independent elastic constants  $C_{11}$ ,  $C_{12}$ ,  $C_{22}$  and  $C_{66}$ . The mechanical stability criteria are  $C_{11} > 0$ ,  $C_{66} > 0$  and  $C_{11} \times C_{22} > C_{12} \times C_{12}$ .<sup>6</sup> Though  $Cm B_2P_4$  also belongs to a monoclinic space group, their corresponding point groups are different and additional criteria is needed for  $Cm B_2P_4$ , namely  $\det(C_{ij}) > 0$ . It has been confirmed that two compounds are both mechanically stable for satisfying the Born-Huang criteria.<sup>7</sup>  $E$ ,  $K$  and  $G$  characterize the hardness of materials, the ability to resist volume and shape change, respectively. As shown in Table S1, both of the values of  $E$  are higher than  $MoS_2$  (122–126 N/m),<sup>8</sup> but lower than that of graphene (330–348.1 N/m).<sup>9</sup> In addition, the values of  $\nu$  are similar to that of graphene (0.15–0.19) lower than the critical

value  $1/3$ ,<sup>10-12</sup> which indicate the brittle nature of the compounds.<sup>13</sup> Furthermore, 2D polar diagram for  $E$ ,  $G$  and  $\nu$  are displayed in Fig. 6 for the purpose of visualizing the anisotropy of two compounds. The closer the shape is to a circle, the stronger the isotropy. It can be found that  $P2_1/m B_1P_3$  is almost isotropic, while  $Cm B_2P_4$  possesses weak anisotropy.

Table S1. Calculated elastic constants  $C_{ij}$  ( $N m^{-1}$ ), Bulk modulus  $K$  ( $N m^{-1}$ ), Young's modulus  $E$  ( $N m^{-1}$ ), Shear modulus  $G$  ( $N m^{-1}$ ) and Poisson ratio  $\nu$  of  $P2_1/m B_1P_3$  and  $Cm B_2P_4$ .

|                 | $C_{11}$ | $C_{12}$ | $C_{16}$ | $C_{22}$ | $C_{26}$ | $C_{66}$ | $K$     | $E$     | $G$    | $\nu$ |
|-----------------|----------|----------|----------|----------|----------|----------|---------|---------|--------|-------|
| $P2_1/m B_1P_3$ | 193.171  | 25.688   | —        | 188.977  | —        | 82.656   | 108.374 | 187.620 | 82.672 | 0.135 |
| $Cm B_2P_4$     | 179.726  | 37.545   | -0.611   | 215.289  | -13.839  | 77.478   | 116.759 | 196.335 | 78.206 | 0.189 |

### 3. Charge-transport Properties

To study the charge-transport performance of  $P2_1/m B_1P_3$  and  $Cm B_2P_4$ , DP parameters have been calculated and listed in Table S2. As shown in Fig. 5(a), the CBM and VBM of  $P2_1/m B_1P_3$ , are located at S and  $\Gamma$  points, respectively, and the flat bands around  $\Gamma$  may contribute to the larger hole effective mass ( $m_h$ ) than electron effective mass ( $m_e$ ) in both  $\mathbf{a}$ - and  $\mathbf{b}$ -directions, leading to neglective carrier mobility. Furthermore,  $m^*$  is anisotropic along different directions in reciprocal space. For  $Cm B_2P_4$ , the CBM and VBM are located at N and M, respectively. Distinctly,  $m_e$  is smaller than  $m_h$  in the  $\mathbf{a}$ -axis but it is adverse in the  $\mathbf{b}$ -axis. There are two other essential related factors,  $E_1$  and  $C$ , and both of them are anisotropic, as shown in Fig. S1, in which (a) and (b) display total energy of the compounds as a function of uniaxial direction. For  $P2_1/m B_1P_3$ , the value of  $C$  in the  $\mathbf{a}$ -axis is slightly larger than that in the  $\mathbf{b}$ -axis, while that of  $Cm B_2P_4$  is opposite. The energy shifts of CBM and VBM under uniaxial strain along the  $\mathbf{a}$ - and  $\mathbf{b}$ -axis are shown in Fig. S1 (c) and (d). Consequently, the predicted values of  $\mu$  are obtained. Excitedly, the electron mobility of  $P2_1/m B_1P_3$  in the  $\mathbf{b}$ -axis is 13 times higher than that of  $MoS_2$  ( $10\text{--}400 \text{ cm}^2 \text{ V}^{-1} \text{ s}^{-1}$ ) and 5 times higher than that of BP ( $200\text{--}1000 \text{ cm}^2 \text{ V}^{-1} \text{ s}^{-1}$ ).<sup>14-18</sup>  $Cm B_2P_4$  exhibits superior electron mobility than that of  $P2_1/m B_1P_3$  especial in the  $\mathbf{a}$ -axis, which is 32 times higher than that of  $MoS_2$  and 13 times higher than that of BP.

Table S2. The deformation potential constant  $E_1$ , elastic constant  $C$ , hole (electron) effective mass  $m^*$  ( $m_e$ ), hole (electron) mobilities and relaxation time for  $P2_1/m B_1P_3$  and  $Cm B_2P_4$  at 300 K.

|                 | Carrier Type    | $E_1$ (eV) | $C$ ( $J m^{-2}$ ) | $m^*$ ( $m_e / m_h$ )  | $\mu$ ( $cm^2 V^{-1} s^{-1}$ ) | $\tau$ (fs) |
|-----------------|-----------------|------------|--------------------|------------------------|--------------------------------|-------------|
| $P2_1/m B_1P_3$ | e- $\mathbf{a}$ | -5.597     | 98.556             | $m_{SX} = 0.351 m_0$   | 692.610                        | 151.941     |
|                 |                 | -5.597     | 98.556             | $m_{SY} = 0.217 m_0$   | 1120.304                       | 151.941     |
|                 | e- $\mathbf{b}$ | 1.940      | 93.684             | $m_{SX} = 0.351 m_0$   | 5479.968                       | 1202.168    |
|                 |                 | 1.940      | 93.684             | $m_{SY} = 0.217 m_0$   | 8863.911                       | 1202.618    |
|                 | h- $\mathbf{a}$ | -3.287     | 98.556             | $m_{rS} = 1.501 m_0$   | 10.173                         | 9.544       |
|                 |                 | -3.287     | 98.556             | $m_{rY} = 108.123 m_0$ | 0.141                          | 9.544       |
|                 | h- $\mathbf{b}$ | -1.234     | 93.684             | $m_{rS} = 1.501 m_0$   | 68.614                         | 64.368      |
|                 |                 | -1.234     | 93.684             | $m_{rY} = 108.123 m_0$ | 0.953                          | 64.368      |
| $Cm B_2P_4$     | e- $\mathbf{a}$ | -1.125     | 88.962             | $m_{NH} = 0.343 m_0$   | 13129.968                      | 2814.737    |
|                 |                 | -1.125     | 88.962             | $m_{NY} = 0.323 m_0$   | 13942.969                      | 2814.737    |
|                 | e- $\mathbf{b}$ | -1.745     | 111.389            | $m_{NH} = 0.343 m_0$   | 6833.066                       | 1464.838    |
|                 |                 | -1.745     | 111.389            | $m_{NY} = 0.323 m_0$   | 7256.166                       | 1464.838    |
|                 | h- $\mathbf{a}$ | -3.760     | 88.962             | $m_{MF} = 0.253 m_0$   | 2228.079                       | 352.315     |
|                 |                 | -3.760     | 88.962             | $m_{MX} = 0.224 m_0$   | 2516.536                       | 352.315     |
|                 | h- $\mathbf{b}$ | 1.851      | 111.389            | $m_{MF} = 0.253 m_0$   | 11511.483                      | 1820.253    |
|                 |                 | 1.851      | 111.389            | $m_{MX} = 0.224 m_0$   | 13001.809                      | 1820.253    |

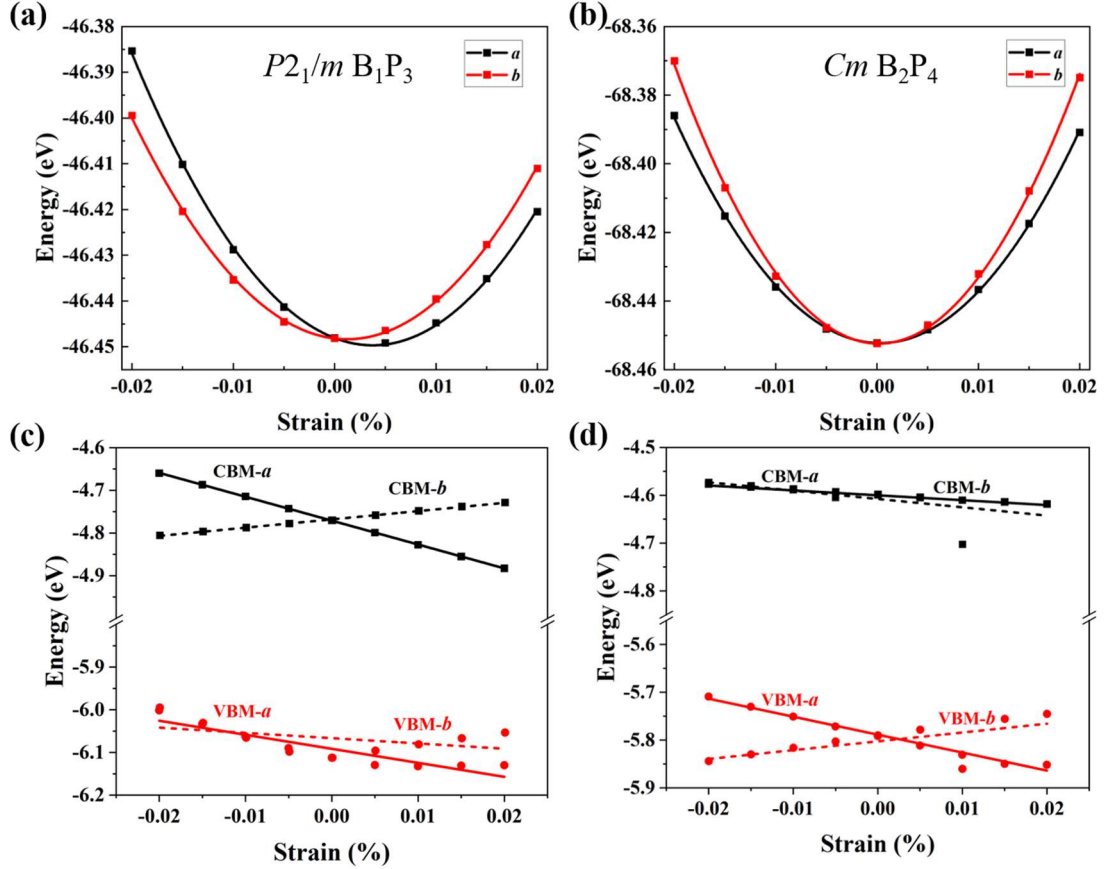

Fig. S1. DP parameters using GGA-PBE functional. (a, b) Total energy of a primitive cell as a function of lattice deformation along the  $a$ - and  $b$ -axis. (c, d) The energy shifts of CBM and VBM under uniaxial strain along the  $a$ - and  $b$ -axis.

#### 4. Electronic Properties and Magnetism Under External Modifications

As presented in Fig. 5(a),  $P2_1/m$   $B_1P_3$  has high DOS around  $E_F$ , which means its exchange splitting energy is larger than the loss in kinetic energy. Based on Stoner criterion, this compound could appear spontaneous ferromagnetism by doping holes.<sup>19</sup> Consistent with prediction,  $P2_1/m$   $B_1P_3$  transforms into a ferromagnetic ground state at critical hole densities, as shown in Fig. S4(b). The magnetic moments of other compounds under charge doping are also studied and shown in Fig. S4(b). Meanwhile, it should be noted that  $B_mP_n$  keep their semiconducting properties in the range studied, except for  $Pmma$   $B_1P_1$ , which keeps metallic properties in the study range.  $Cm$   $B_2P_4$  and  $Pmn2_1$  BS- $B_1P_1$  have similar electronic energy bands, which may contribute to the similar change of magnetic moments upon charge doping. Both of them behave as ideal half-metallic phases with 100% spin polarization around  $E_F$  at specific charge doping level. Particularly for  $Pmn2_1$  BS- $B_1P_1$ , a small step of magnetic moments appears when the electron doping level  $< 0.2$  per cell, which means it can maintain the fully spin polarization state within a range. For  $P3m1$  BH- $B_1P_1$ , the ratio of spin polarization can also reach 100% during doping 0.05 – 0.1 electron into one unit cell. For  $P-6m2$  PH- $B_1P_1$ , the magnetic moments fluctuate in a small range ( $< 0.2 \mu_B/\text{charge}$ ) under charge doping. These structures have been confirmed with the potential applications in magnetic semiconductors.

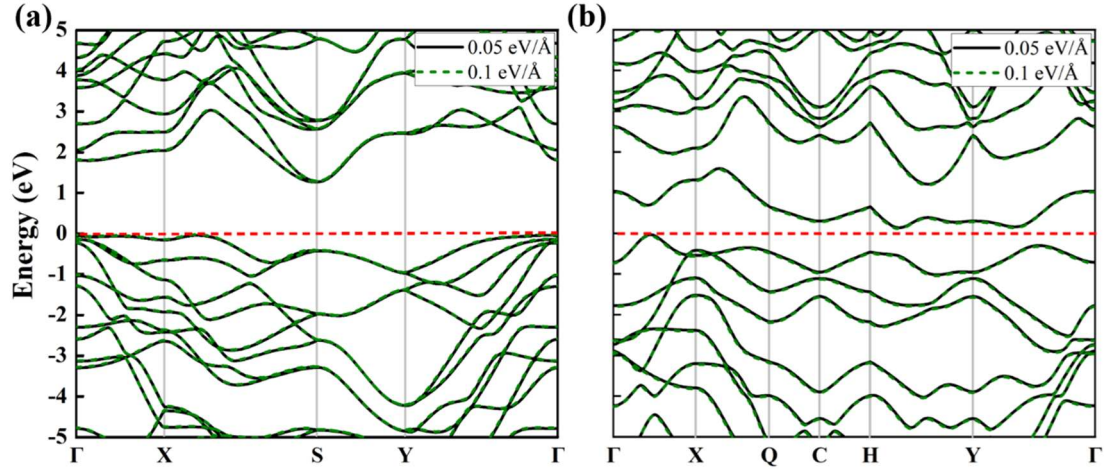

Fig. S2. The band structure of  $P2_1/m B_1P_3$  and  $Cm B_2P_4$  under an external electric field along normal direction.

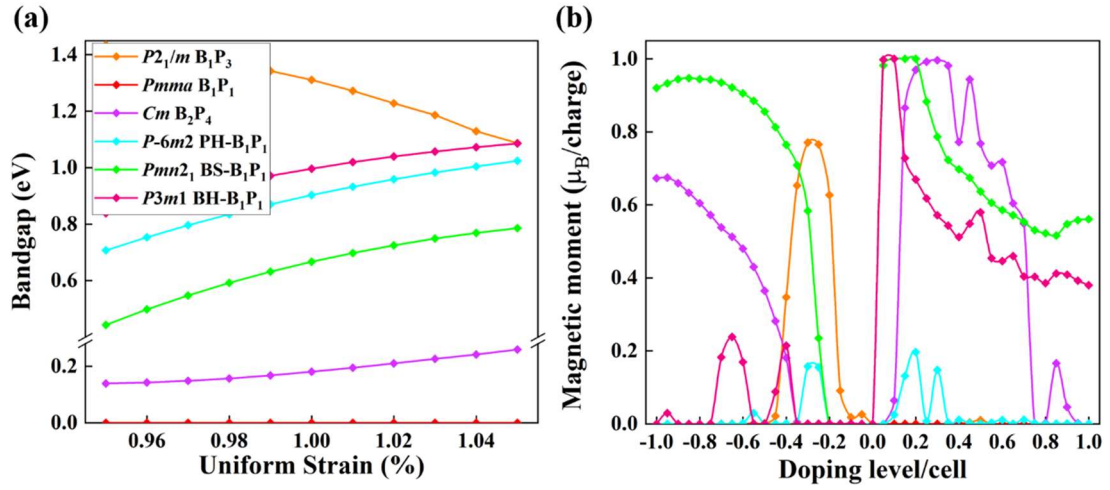

Fig. S3. (Color online) (a) The bandgaps as a function of uniform strain at GGA-PBE level. (b) The magnetic moments of charge-doped  $B_mP_n$ . The points represent the actual calculated values, and straight lines are the fit trends.

## 5. Cartesian Coordinates

Table S3. The Cartesian coordinates of optimized structures of Fig. 2.

|                 |   |             |             |             |
|-----------------|---|-------------|-------------|-------------|
| $P2_1/m B_1P_3$ | P | 5.433231252 | 0.787032559 | 8.877891939 |
|                 | P | 0.831709114 | 2.416798578 | 7.808816239 |
|                 | P | 1.666625133 | 0.786952138 | 5.073872223 |
|                 | P | 3.643400212 | 0.786911038 | 6.037181691 |
|                 | P | 2.808472324 | 2.416715073 | 8.772065752 |
|                 | B | 4.687858211 | 2.416699918 | 4.968145763 |
|                 | B | 0.820792672 | 2.416657112 | 5.872357590 |
|                 | B | 3.654305038 | 0.786970871 | 7.973599974 |
| $Pmma B_1P_1$   | P | 1.194920897 | 1.595119715 | 7.172534973 |
|                 | P | 0.000000000 | 1.595119715 | 3.550620434 |
|                 | B | 1.194920897 | 0.000000000 | 6.045477576 |
|                 | B | 0.000000000 | 0.000000000 | 4.677665503 |
| $Cm B_2P_4$     | P | 1.067229112 | 2.000346826 | 5.727902156 |

|                                      |   |              |             |             |
|--------------------------------------|---|--------------|-------------|-------------|
|                                      | P | 1.858836774  | 0.594916960 | 3.890544678 |
|                                      | P | 4.126753998  | 1.398471662 | 4.846620499 |
|                                      | P | 2.314434298  | 2.500764063 | 3.181123816 |
|                                      | B | 2.354160938  | 0.750679268 | 5.148728656 |
|                                      | B | -1.056074346 | 2.988373182 | 4.078145986 |
| <i>P-6m2</i> PH- $B_1P_1$            | P | 0.000000000  | 0.000000000 | 9.970239639 |
|                                      | B | 0.000000000  | 1.854874675 | 9.970239639 |
| <i>Pmn2<sub>1</sub></i> BS- $B_1P_1$ | P | 1.599130034  | 0.666851680 | 6.578180194 |
|                                      | P | 0.000000000  | 3.318391642 | 7.500000000 |
|                                      | B | 0.000000000  | 0.000000000 | 7.500000000 |
|                                      | B | 1.599130034  | 2.651540041 | 6.578180194 |
| <i>P3m1</i> BH- $B_1P_1$             | P | 0.000000000  | 0.000000000 | 7.500000000 |
|                                      | B | -0.000001054 | 1.856758401 | 8.156234622 |

## 6. Comparison with $B_mN_n$

Since N atom and P atom are isobal, we have compared the structures of  $B_mN_n$  with the corresponding structures of  $B_mP_n$ . Wang *et al.* have reported some energetically stable single layer  $B_mN_n$  compounds with various chemical composition ( $B_2N_3$ ,  $B_3N_4$  and  $B_3N_5$ ) based on the particle swarm optimization (PSO) algorithm.<sup>20</sup> The bandgaps of all  $B_mN_n$  are larger than those of our identified  $B_mP_n$ . It is different between the structures of  $B_2N_3$ ,  $B_3N_4$  and  $B_3N_5$  and *P-6m2* PH- $B_1P_1$ , *Pmn2<sub>1</sub>* BS- $B_1P_1$  and *P3m1* BH- $B_1P_1$ , though they are all planer structures. The former consists of five-, six-, seven- and eight-membered rings of B-N, but the latter is constructed by only six-membered rings of B-P. Both Li *et al.* and Liu *et al.* have reported pentagonal  $B_mN_n$  sheets (*penta*- $B_mN_n$ ),<sup>21, 22</sup> in which only *penta*-BN and *penta*-BN<sub>2</sub> have been confirmed with dynamical stability from the phonon spectra, formation energy analysis, molecular dynamic simulation and mechanical stability analysis. The band structures show that *penta*-BN is an indirect bandgap semiconductor, while *penta*-BN<sub>2</sub> is metallic. In contrast to the six  $B_mP_n$  compounds, the structures with dynamical stability are all semiconductors.

## 7. References

- 1 H. Yao, L. Ouyang and W.-Y. Ching, *J. Am. Ceram. Soc.*, 2007, **90**, 3194-3204.
- 2 R. Hill, *Proc. Phys. Soc. Lond.*, 1952, **65**, 349-354.
- 3 J. Bardeen and W. Shockley, *Phys. Rev.*, 1950, **80**, 72-80.
- 4 J. Xi, M. Long, L. Tang, D. Wang and Z. Shuai, *Nanoscale*, 2012, **4**, 4348-4369.
- 5 N. Wang, M. Li, H. Xiao, H. Gong, Z. Liu, X. Zu and L. Qiao, *Phys. Chem. Chem. Phys.*, 2019, **21**, 15097-15105.
- 6 R. Li, Q. Shao, E. Gao and Z. Liu, *Extreme Mech. Lett.*, 2020, **34**, 100615.
- 7 M. Born, K. Huang and M. Lax, *Am. J. Phys.*, 1955, **23**, 474-474.
- 8 K.-A. N. Duerloo, M. T. Ong and E. J. Reed, *J. Phys. Chem. Lett.*, 2012, **3**, 2871-2876.
- 9 M. Yagmurcukardes, R. T. Senger, F. M. Peeters and H. Sahin, *Phys. Rev. B*, 2016, **94**, 245407.
- 10 F. Liu, P. Ming and J. Li, *Phys. Rev. B*, 2007, **76**, 064120.
- 11 R. C. Andrew, R. E. Mapasha, A. M. Ukpong and N. Chetty, *Phys. Rev. B*, 2012, **85**, 125428.
- 12 M. Topsakal, S. Cahangirov and S. Ciraci, *Appl. Phys. Lett.*, 2010, **96**, 091912.
- 13 W.-C. Hu, Y. Liu, D.-J. Li, X.-Q. Zeng and C.-S. Xu, *Comput. Mater. Sci.*, 2014, **83**, 27-34.
- 14 Y. Cai, G. Zhang and Y.-W. Zhang, *J. Am. Chem. Soc.*, 2014, **136**, 6269-6275.
- 15 K. Kaasbjerg, K. S. Thygesen and K. W. Jacobsen, *Phys. Rev. B*, 2012, **85**, 115317.
- 16 B. Radisavljevic, A. Radenovic, J. Brivio, V. Giacometti and A. Kis, *Nature Nanotech.*, 2011, **6**, 147-150.

- 17 J. Xiao, M. Long, X. Zhang, D. Zhang, H. Xu and K. S. Chan, *J. Phys. Chem. Lett.*, 2015, **6**, 4141-4147.
- 18 A. N. Rudenko, S. Brener and M. I. Katsnelson, *Phys. Rev. Lett.*, 2016, **116**, 246401.
- 19 B. Huang, H. L. Zhuang, M. Yoon, B. G. Sumpter and S.-H. Wei, *Phys. Rev. B*, 2015, **91**, 121401.
- 20 Y. Wang, M. Miao, J. Lv, L. Zhu, K. Yin, H. Liu and Y. Ma, *J. Chem. Phys.*, 2012, **137**, 224108.
- 21 J. Li, X. Fan, Y. Wei and G. Chen, *Sci. Rep.*, 2016, **6**, 31840.
- 22 L. Z. Liu, Q. T. Pang and Y. Liu, *Mater. Sci. Forum*, 2018, **913**, 573-581.
